# Supplementary material
Source: PubMed Central journal article supplement (PMC5621900)
Supplement: jciinsight-2-95193-s001.pdf [file jciinsight-2-95193-s001.pdf]

## Supplemental data

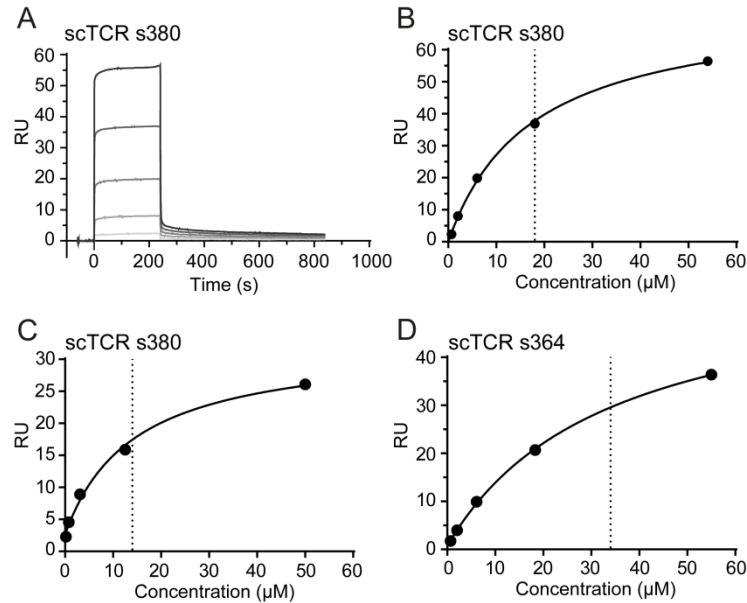

**Figure S1. Surface Plasmon Resonance (SPR) data of single chain T-cell receptor (scTCR) s380 and s364 binding to DQ2.5:DQ2.5-gliadin- $\alpha$ 1a and DQ2.5:DQ2.5-gliadin- $\alpha$ 2, respectively. (A)** Representative sensogram of scTCR s380 binding to immobilized DQ2.5:DQ2.5-gliadin- $\alpha$ 1a using a classical multi-cycle kinetic SPR setup. The affinity was determined by fitting the data to a 1:1 Langmuir binding model. **(B)** Equilibrium dissociation constant ( $K_D$ ) was determined by plotting the response at equilibrium from (A) against the concentration of analyte (scTCR s380). **(C and D)** The equilibrium responses of the single-cycle kinetics data in Figure 1C and D plotted against the concentration of (C) scTCR s380, and (D) scTCR s364 to derive the equilibrium dissociation constant ( $K_D$ ). Dotted line indicates the  $K_D$  based on fitting the response to saturation. The  $K_D$  values are summarised in Table S1.

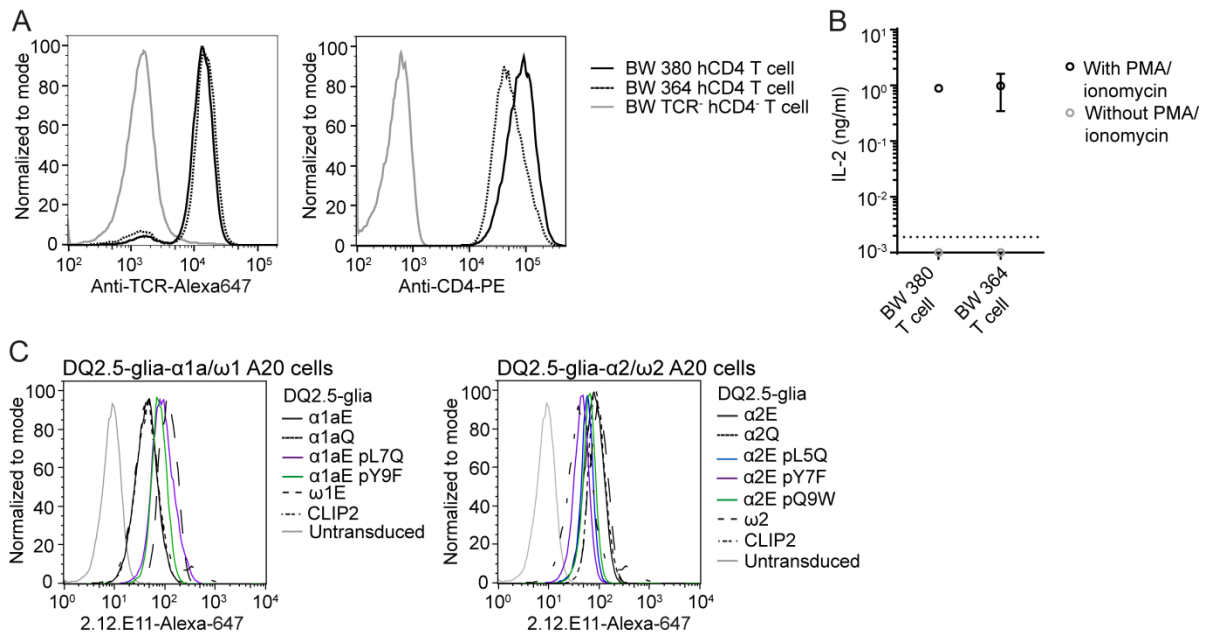

**Figure S2. Validation of T-cell receptor (TCR), CD4 and HLA-DQ2.5-peptide expression levels and stimulatory capacity of the BW 380 and 364 T cells.** (A) BW 380 and 364 T cells stained with either anti-TCR-Alexa 647 or anti-CD4-PE mAbs were analyzed by flow cytometry to validate the TCR and CD4 expression levels. Untransduced BW T cells devoid of endogenous TCR and human CD4 were used as control. (B) The BW 380 and 364 T cells were stimulated with a PMA/ionomycin followed by measurement of IL-2 secretion to assess their stimulatory capacity. The dotted line indicates the detection limit, and error bars indicate  $\pm$  SD of triplicates and are only shown if they exceed the size of the symbol. (C) HLA-DQ2.5-peptide expression levels on the A20 cells transfected with HLA-DQ2.5 with covalently linked peptide was assessed in flow cytometry after staining with the biotinylated mAb 2.12.E11 specific for HLA-DQ2  $\beta$ -chain, followed by streptavidin Alexa-647. Untransduced A20 cells devoid of HLA were used as control. (A-C) Two (A and C) or three (B) independent experiments were conducted. (B) Figures were prepared using GraphPad Prism 7. Non-linear regression analysis (three parameters) was used to derive IL-2 concentrations from the standard curves.

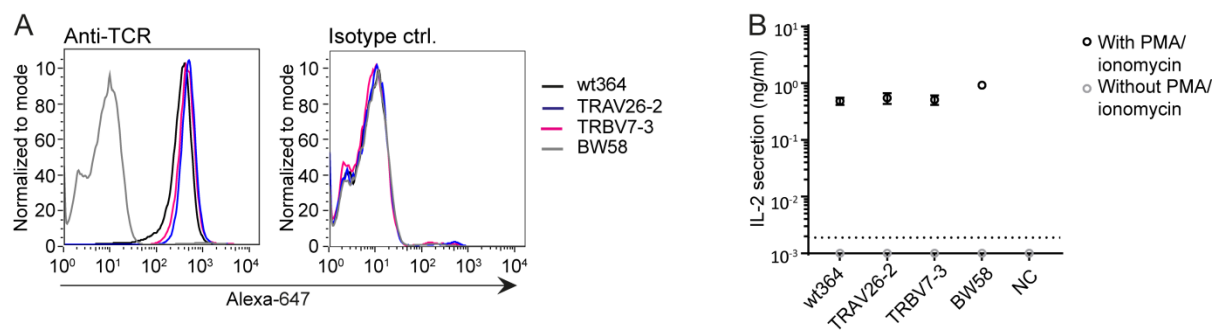

**Figure S3. T-cell receptor (TCR) expression level and stimulatory capacity of the BW 364 T cells and the BW 364 T cell variants.** The *TRAV* and *TRBV* BW T cell exchange mutants were evaluated by **(A)** staining with anti-TCR-Alexa-647 mAb, or isotype control, followed by analysis by flow cytometry to validate TCR expression levels, and **(B)** stimulation with a PMA/ionomycin cocktail followed by measurement of IL-2 secretion to assess equal stimulatory capacity. The dotted line indicates the detection limit, and error bars indicate  $\pm$  SD of triplicates and are only shown if they exceed the size of the symbol. **(A-B)** Two (A) or four (B) independent experiments were conducted. **(B)** Figures were prepared using GraphPad Prism 7. Non-linear regression analysis (three parameters) was used to derive IL-2 concentrations from the standard curves.

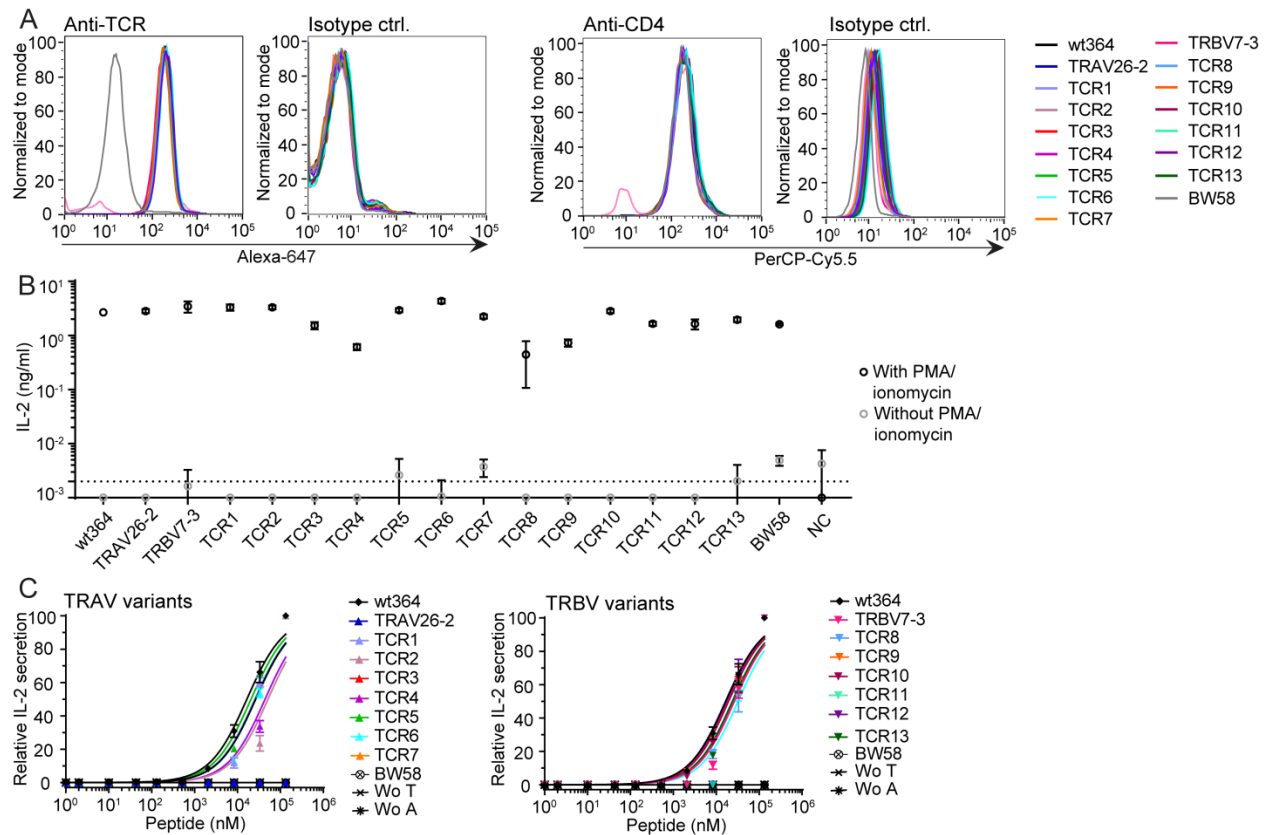

**Figure S4. T-cell receptor (TCR) and CD4 expression levels and stimulatory capacity of the BW 364 T cell variants.** All *TRAV* and *TRBV* mutant variants used to assess the contribution of germline variants were evaluated by **(A)** staining with anti-TCR-Alexa-647, anti-CD4-PerCP-Cy5.5, or isotype controls, followed by flow cytometry, and **(B)** stimulation with a PMA/ionomycin cocktail followed by measurement of IL-2 secretion. The dotted line indicates the detection limit, and error bars indicate  $\pm$  SD of triplicates and are only shown if they exceed the size of the symbol. **(C)** HLA-DQ2.5<sup>+</sup> EBV-B cells were loaded with native 33merQ peptide and IL-2 secretion level determined by ELISA. Error bars indicate  $\pm$  SD of triplicates. **(A-C)** Two (A) or four (B and C) independent experiments were conducted. **(B and C)** Figures were prepared using GraphPad Prism 7. Non-linear regression analysis (three parameters) was used to derive IL-2 concentrations from the standard curves.

**Table S1. SPR data of scTCRs s380 and s364**

| TCR clone | Method           | $K_D$ (kd/ka) | $K_D$ (eq.) | Average $K_D$   |
|-----------|------------------|---------------|-------------|-----------------|
| 380       | SCK <sup>A</sup> | 7.9           | 14.3        | 11.1            |
| 380       | SCK <sup>A</sup> | 21.6          | 24.5        | 23.1            |
| 380       | MCK <sup>B</sup> | 15.1          | 17.5        | 16.3            |
| 380       |                  |               |             | 17 <sup>C</sup> |
| 364       | SCK <sup>A</sup> | 47.6          | 42.3        | 45.0            |
| 364       | SCK <sup>A</sup> | 31.3          | 33.9        | 32.6            |
| 364       | SCK <sup>A</sup> | 35.4          | NA          | NA              |
| 364       |                  |               |             | 38 <sup>C</sup> |

<sup>A</sup> SCK; single-cycle kinetics

<sup>B</sup> Classical MCK; multi-cycle kinetics

<sup>C</sup> Average  $K_D$  value based on values derived from both the affinity constant (kd/ka) and the equilibrium dissociation constant.

**Table S2. Sequence alignment of TRAV26-1 and other TRAVs paired with the canonical CDR3 $\beta$  in CD patients.**

| V-gene <sup>A</sup> | FR1                         | CDR1                 | FR2                                | CDR2       | FR3                                           |
|---------------------|-----------------------------|----------------------|------------------------------------|------------|-----------------------------------------------|
| IMGT no.            | 1 ----->26                  | 27----->38           | 39----->55                         | 56----->65 | 66 ----->104                                  |
| TRAV26-1            | DAKTTQ.PPSMDCAE GRAANLPCNHS | TISG.....NE <b>Y</b> | V <b>Y</b> WYRQIH SQGPQYI <b>H</b> | GLK.....NN | ETNE...MASLIITEDR KSSTLILPHATL RDTAVYYC       |
| TRAV5               | GEDVEQS.LFLSVRE GDSSVINCTYT | DSS.....ST <b>Y</b>  | LYWYKQEP GAGLQLL <b>Y</b>          | IFSN...MDM | KQD.....Q RLTVLLNKD KHLRLRIADTQT GDSAIYFC AES |
| TRAV39              | ELKVEQNPLFLSMQE GKNYTIYCNY  | TTS.....DR           | LYWYRQDP GKSLES <b>FV</b>          | LLSN...GAV | KQE.....G RLMSLDTKA RLSTLHITAAPH DLSATYFC AVD |
| TRAV8-6             | AQSVTLQDSQVPVFE EAPVELRCNYS | SSV.....SV <b>Y</b>  | LFWYVQYP NQGLQLL <b>K</b>          | YLSG..STLV | ESI.....N GFEEAFNKSQ TSFHLRKPVHI SDTAEYFC     |
| TRAV38-1            | AQTVTQSQPEMSVQE AETVLSCTYD  | TSEN.....NY <b>Y</b> | LFWYKQPP SRQMILV <b>IR</b>         | QEAY..KQQN | ATE.....N RFSVNFQKAA KFSFLKISDSQL GDTAMYFC    |
| TRAV29 <sup>B</sup> | DQQVKQNSPSSLVQE GRISILNCDYT | NSM.....FD <b>Y</b>  | FLWYKQYP AEGPTFL <b>S</b>          | ISSI...KDK | NED.....G RFTVFLNKSA KHLHLHIVPSQP GDSAVYFC    |
| TRAV13-2            | GESVGLHPLTLVQE GDNSIINCAYS  | NSA.....SD <b>Y</b>  | FIWYKQES GKGPQFI <b>D</b>          | IRSN...MDK | RQG.....Q RVTVLLNKTV KHLSLQJAATQP GDSAVYFC    |
| TRAV12-3            | QKEVEQDPGPLSVPE GAIVSLNCTYS | NSA.....FQ <b>Y</b>  | FMWYRQYS RKGPELL <b>Y</b>          | TYS....SGN | KED.....G RFTAQVDKSS KYISLFIRDSQP SDSATYLC    |

<sup>A</sup> TRAV gene segment usage and numbering was defined by the IMGT Database.

<sup>B</sup> TRAV29/DV5

Amino acids in position 38, 40 and 55 are indicated in bold and red characters.

**Table S3. Gene segment usage and CDR3 sequences of the clones**

| Clone                | TRAV                | CDR3            | TRAJ   | TRBV    | CDR3          | TRBJ    |
|----------------------|---------------------|-----------------|--------|---------|---------------|---------|
| 380                  | TRAV9-2             | ALSDHYSSGSARQLT | TRAJ22 | TRBV7-2 | ASSTAVLAGGPQY | TRBJ2-7 |
| 364                  | TRAV26-1            | IVTNNNDMR       | TRAJ43 | TRBV7-2 | ASSIRSTDTQY   | TRBJ2-3 |
| AV5BV7 <sup>A</sup>  | TRAV5               | AESPGPGKLI      | TRAJ37 | TRBV7-2 | ASSLRSADTQY   | TRBJ2-3 |
| AV39BV7 <sup>A</sup> | TRAV39              | AVDPP           | TRAJ43 | TRBV7-3 | ASSFRSTDTQY   | TRBJ2-3 |
| AV8TV7 <sup>A</sup>  | TRAV8-6             | AVTRNSGGYQKVT   | TRAJ13 | TRBV7-2 | ASSIRSTDTQY   | TRBJ2-3 |
| AV38TV7 <sup>A</sup> | TRAV38-1            | APDPSTSGTYKYI   | TRAJ40 | TRBV7-2 | ASSLRFDTQY    | TRBJ2-3 |
| AV29TV7 <sup>A</sup> | TRAV29 <sup>B</sup> | AEGITGANSKLT    | TRAJ56 | TRBV7-2 | ASSIRATDTQY   | TRBJ2-3 |
| AV13TV7 <sup>A</sup> | TRAV13-2            | AESGYSTLT       | TRAJ11 | TRBV7-2 | ASSVRSTDTQY   | TRBJ2-3 |
| AV12TV7 <sup>A</sup> | TRAV12-3            | AMKEYGNKLV      | TRAJ47 | TRBV7-2 | ASSLRSTDTQY   | TRBJ2-3 |

TRAV gene segment usage and numbering was defined by the IMGT Database.

<sup>A</sup> Clonotypes identified by high-throughput sequencing

<sup>B</sup> TRAV29/DV5
